# Supplementary material for: Metal-modified C3N1 monolayer sensors for battery instability monitoring
Source: Royal Society of Chemistry journal article supplement (doi:10.1039/d4ta00645c), 2024-01-01
Supplement: d4ta00645c1.pdf [file d4ta00645c1.pdf]

Supporting Information

**Metal-Modified C<sub>3</sub>N<sub>1</sub> Monolayer Sensors for Battery Instability  
Monitoring**

Mingyang Gu <sup>a</sup>, Lin Tao <sup>a,\*</sup>, Davoud Dastan <sup>b</sup>, Jie Dang <sup>c</sup>,  
Timing Fang <sup>d</sup>, and Baigang An <sup>a,\*</sup>

<sup>a</sup> *School of Chemical Engineering, University of Science and Technology  
Liaoning, Anshan 114051, China*

<sup>b</sup> *Department of Materials Science and Engineering, Cornell University, Ithaca,  
New York 14850, United States*

<sup>c</sup> *College of Materials Science and Engineering, Chongqing University,  
Chongqing 400044, China*

<sup>d</sup> *School of Chemistry and Chemical Engineering, Qingdao University,  
Qingdao 266071, China*

**\*Corresponding authors at:** School of Chemical Engineering, University of  
Science and Technology Liaoning, Anshan 114051, China

*E-mail addresses:* [taolin@ustl.edu.cn](mailto:taolin@ustl.edu.cn) (L. Tao),

*E-mail addresses:* [bgan@ustl.edu.cn](mailto:bgan@ustl.edu.cn) (B. An)

## Table of Contents

|                                                                                                                                                                                                                                                                                         |
|-----------------------------------------------------------------------------------------------------------------------------------------------------------------------------------------------------------------------------------------------------------------------------------------|
| <b>Computational section</b>                                                                                                                                                                                                                                                            |
| <b>Details of thermodynamic calculation</b>                                                                                                                                                                                                                                             |
| <b>Details of diffusion performance calculation</b>                                                                                                                                                                                                                                     |
| <b>Figure S1.</b> The energy fluctuations with time process for the <i>ab initio</i> molecular dynamics of Cu/Ag-C <sub>2</sub> N <sub>1</sub> monolayer.                                                                                                                               |
| <b>Figure S2.</b> Electrostatic potential and work function of (a) the Cu-C <sub>2</sub> N <sub>1</sub> and (b) the Ag-C <sub>2</sub> N <sub>1</sub> monolayer.                                                                                                                         |
| <b>Figure S3.</b> Adsorption structures of C <sub>2</sub> H <sub>4</sub> at different sites on the Ag-C <sub>2</sub> N <sub>1</sub> .                                                                                                                                                   |
| <b>Figure S4.</b> Adsorption structures of C <sub>2</sub> H <sub>6</sub> at different sites on the Ag-C <sub>2</sub> N <sub>1</sub> .                                                                                                                                                   |
| <b>Figure S5.</b> Adsorption structures of H <sub>2</sub> O at different sites on the Ag-C <sub>2</sub> N <sub>1</sub> .                                                                                                                                                                |
| <b>Figure S6.</b> Adsorption structures of NH <sub>3</sub> at different sites on the Ag-C <sub>2</sub> N <sub>1</sub> .                                                                                                                                                                 |
| <b>Figure S7.</b> Adsorption structures of NO <sub>2</sub> at different sites on the Ag-C <sub>2</sub> N <sub>1</sub> .                                                                                                                                                                 |
| <b>Figure S8.</b> Adsorption structures of PF <sub>5</sub> at different sites on the Ag-C <sub>2</sub> N <sub>1</sub> .                                                                                                                                                                 |
| <b>Figure S9.</b> Adsorption structures of C <sub>2</sub> H <sub>4</sub> at different sites on the Cu-C <sub>2</sub> N <sub>1</sub> .                                                                                                                                                   |
| <b>Figure S10.</b> Adsorption structures of PF <sub>5</sub> at different sites on the Cu-C <sub>2</sub> N <sub>1</sub> .                                                                                                                                                                |
| <b>Figure S11.</b> Adsorption structures of C <sub>2</sub> H <sub>6</sub> at different sites on the Cu-C <sub>2</sub> N <sub>1</sub> .                                                                                                                                                  |
| <b>Figure S12.</b> Adsorption structures of NH <sub>3</sub> at different sites on the Cu-C <sub>2</sub> N <sub>1</sub> .                                                                                                                                                                |
| <b>Figure S13.</b> Adsorption structures of H <sub>2</sub> O at different sites on the Cu-C <sub>2</sub> N <sub>1</sub> .                                                                                                                                                               |
| <b>Figure S14.</b> Adsorption structures of NO <sub>2</sub> at different sites on the Cu-C <sub>2</sub> N <sub>1</sub> .                                                                                                                                                                |
| <b>Figure S15.</b> The initial adsorption configuration of gases (PF <sub>5</sub> , NO <sub>2</sub> , NH <sub>3</sub> , H <sub>2</sub> O, C <sub>2</sub> H <sub>4</sub> , and C <sub>2</sub> H <sub>6</sub> ) on the Ag-C <sub>2</sub> N <sub>1</sub> .                                 |
| <b>Figure S16.</b> The initial adsorption configuration of gases (PF <sub>5</sub> , NO <sub>2</sub> , NH <sub>3</sub> , H <sub>2</sub> O, C <sub>2</sub> H <sub>4</sub> , and C <sub>2</sub> H <sub>6</sub> ) on the Cu-C <sub>2</sub> N <sub>1</sub> .                                 |
| <b>Figure S17.</b> The COHP between gases (C <sub>2</sub> H <sub>4</sub> , PF <sub>5</sub> , C <sub>2</sub> H <sub>6</sub> , H <sub>2</sub> O, NH <sub>3</sub> , and NO <sub>2</sub> ) and the Ag-C <sub>2</sub> N <sub>1</sub> .                                                       |
| <b>Figure S18.</b> The COHP between gases (C <sub>2</sub> H <sub>4</sub> , PF <sub>5</sub> , C <sub>2</sub> H <sub>6</sub> , H <sub>2</sub> O, NH <sub>3</sub> , and NO <sub>2</sub> ) and the Cu-C <sub>2</sub> N <sub>1</sub> .                                                       |
| <b>Figure S19.</b> DOS and PDOS of (a) C <sub>2</sub> H <sub>4</sub> , (b) C <sub>2</sub> H <sub>6</sub> , (c) PF <sub>5</sub> , (d) H <sub>2</sub> O, (e) NH <sub>3</sub> , (f) NO <sub>2</sub> on the Ag-C <sub>2</sub> N <sub>1</sub> monolayer.                                     |
| <b>Figure S20.</b> DOS and PDOS of (a) C <sub>2</sub> H <sub>4</sub> , (b) C <sub>2</sub> H <sub>6</sub> , (c) PF <sub>5</sub> , (d) H <sub>2</sub> O, (e) NH <sub>3</sub> , (f) NO <sub>2</sub> on the Cu-C <sub>2</sub> N <sub>1</sub> monolayer.                                     |
| <b>Figure S21.</b> The initial and the final stable configurations of gas on the Ag-C <sub>2</sub> N <sub>1</sub> . (a) NH <sub>3</sub> , (b) H <sub>2</sub> O, (c) PF <sub>5</sub> , (d) C <sub>2</sub> H <sub>6</sub> , (e) C <sub>2</sub> H <sub>4</sub> , and (f) NO <sub>2</sub> . |
| <b>Figure S22.</b> The initial and the final stable configurations of gas on the Cu-C <sub>2</sub> N <sub>1</sub> . (a) NH <sub>3</sub> , (b) H <sub>2</sub> O, (c) PF <sub>5</sub> , (d) C <sub>2</sub> H <sub>6</sub> , (e) C <sub>2</sub> H <sub>4</sub> , and (f) NO <sub>2</sub> . |
| <b>Figure S23.</b> The stable configurations of NO <sub>2</sub> on the Ag-C <sub>2</sub> N <sub>1</sub> at different                                                                                                                                                                    |

|                                                                                                                                                                                                          |
|----------------------------------------------------------------------------------------------------------------------------------------------------------------------------------------------------------|
| temperatures. (a) 300 K, (b) 400 K, (c) 500 K, (d) 600 K, and (e) 700 K.                                                                                                                                 |
| <b>Figure S24.</b> The stable configurations of NO <sub>2</sub> on the Cu-C <sub>2</sub> N <sub>1</sub> at different temperatures. (a) 300 K, (b) 400 K, (c) 500 K, (d) 600 K, (e) 700 K, and (f) 800 K. |
| <b>Table S1.</b> The amount of charge transferred by the gas adsorbed.                                                                                                                                   |
| <b>Table S2.</b> Diffusion coefficient of six gases on the Cu/Ag-C <sub>2</sub> N <sub>1</sub> monolayer at 300 K                                                                                        |
| <b>Table S3.</b> Diffusion coefficients of NO <sub>2</sub> on the Cu/Ag-C <sub>2</sub> N <sub>1</sub> at different temperatures.                                                                         |
| <b>Table S4.</b> The recovery time (s) of the gas on the Cu-C <sub>2</sub> N <sub>1</sub> .                                                                                                              |
| <b>Table S5.</b> The recovery time (s) of the gas on the Ag-C <sub>2</sub> N <sub>1</sub> .                                                                                                              |
| <b>References</b>                                                                                                                                                                                        |

**Computational section**

For the original C<sub>3</sub>N<sub>1</sub>, Ag-C<sub>2</sub>N<sub>1</sub>, Cu-C<sub>2</sub>N<sub>1</sub>, PF<sub>5</sub>, NO<sub>2</sub>, NH<sub>3</sub>, H<sub>2</sub>O, C<sub>2</sub>H<sub>4</sub>, and C<sub>2</sub>H<sub>6</sub>, all structural optimization and electronic performance calculations are performed using DFT, based on Dmol<sup>3</sup> code [1] under the Perdew-Burke-Ernzerhof functional, gradient approximation method correlation [2, 3], double precision number basis set polarization function is used to process atomic orbitals. The dispersion-corrected DFT method was selected based on Grimme vdW correction [4], which can accurately describe the interaction in all weak calculations. The global cut-off radius of real space is 4.9 Å, and the Monkhorst–Pack scheme is used to sample 3 × 2 × 1 k points in the Brillouin area to complete high-quality theoretical evaluation. In addition, the convergence tolerance of geometry optimization is 1 × 10<sup>-5</sup> Ha for the total energy, 0.002 Ha/Å for the atomic force, and 0.005 Å for the highest displacement, respectively. The electron distribution and charge transfer were calculated using the Mulliken method [5]. To eliminate interactions between periodic images, use a 20 Å vacuum layer vertically to the Cu/Ag-C<sub>2</sub>N<sub>1</sub> monolayer. The C-N bond length is 1.41 Å, the C-C bond length is 1.43 Å, and the maximum spacing of C-N-C-C is 2.83 Å in the initial C<sub>3</sub>N<sub>1</sub> monolayer.

## Details of thermodynamic calculation

These mainly include enthalpy, entropy, and the Gibbs free energy.

First, enthalpy (H) is calculated by

$$\begin{aligned}
 H &= H_{trans} + H_{rot} + H_{vib} + RT \\
 &= \frac{R}{2k} \sum_i hv_i + \frac{R}{k} \sum_i \frac{hv_i \exp(-hv_i/kT)}{[1 - \exp(-hv_i/kT)]^2} + 4R
 \end{aligned} \quad (1)$$

where  $H_{trans}$ ,  $H_{rot}$  and  $H_{vib}$  are the translation enthalpy, rotation enthalpy, and vibration enthalpy (kcal/mol), respectively.  $R$  and  $T$  are the ideal gas constant (8.314 J/mol/K) and the absolute temperature (K), accordingly.  $k$  is the Boltzmann constant,  $h$  is Planck's constant, and  $\nu_i$  is the vibrational frequency.

Second, entropy (S) is given by

$$\begin{aligned}
 S &= S_{trans} + S_{rot} + S_{vib} \\
 &= \frac{5}{2}R \ln T + \frac{5}{2}R \ln w - \frac{5}{2}R \ln p - 2.3482 \\
 &\quad + \frac{R}{2} \ln \left[ \frac{\pi}{\sqrt{\sigma}} \frac{8\pi^2 c l_A}{h} \frac{8\pi^2 c l_B}{h} \frac{8\pi^2 c l_C}{h} \left( \frac{kT}{hc} \right)^3 \right] \\
 &\quad + \frac{3}{2}R + R \sum_i \frac{hv_i/kT \exp(-hv_i/kT)}{1 - \exp(-hv_i/kT)} \\
 &\quad - R \sum_i \ln [1 - \exp(-hv_i/kT)]
 \end{aligned} \quad (2)$$

Where  $S_{trans}$ ,  $S_{rot}$ , and  $S_{vib}$  are the translation, rotation, and vibration entropies (cal/mol/K), accordingly.  $w$  is the molecular mass,  $p$  is the pressure,  $\sigma$  is the symmetry number,  $c$  is the molar concentration of the molecules, and  $I_{A(B,C)}$  is the moment of inertia.

Finally, the Gibbs free energy ( $G$ ) (kJ/mol) is defined as

$$G = E(OK) + H - T \cdot S \quad (3)$$

where  $E(0 K)$  is the zero-point energy (kcal/mol).

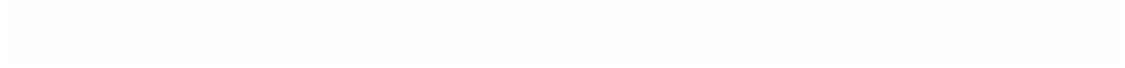

### Details of diffusion performance calculation

From the point of view of gas motion (diffusion), the main energy barrier to be overcome in NO<sub>2</sub> adsorption on the Ag-C<sub>2</sub>N<sub>1</sub> and Cu-C<sub>2</sub>N<sub>1</sub> monolayer was the gas diffusion energy barrier. The diffusion activation energy can be obtained by calculating the gas motion parameters according to molecular dynamics simulation with our previous work [6], and by this means, the energy barrier of NO<sub>2</sub> adsorption on the Cu/Ag-C<sub>2</sub>N<sub>1</sub> monolayer can be well verified. Therefore, the mean-squared displacement (MSD) and diffusion coefficients (Ds) were used to investigate the diffusion properties of gases according to the Einstein diffusion law; these quantities were computed by the following equations.

$$MSD(t) = \frac{1}{N} \sum_{i=1}^N \langle [r_i(t) - r_i(0)]^2 \rangle \quad (4)$$

$$D_s = \frac{1}{6} \lim_{t \rightarrow \infty} \frac{d}{dt} \sum_i^n \langle [r_i(t) - r_i(0)]^2 \rangle \quad (5)$$

where  $N$  is the number of molecules,  $r_i(t)$  is the position of molecule when the time is  $t$ , and  $r_i(0)$  is the initial position. According to Equations (4) and (5), the diffusion coefficients were calculated and are shown in **Table S2 and S3**.

After a series of the diffusion coefficients,  $D_s$ , of NO<sub>2</sub> at different temperatures were obtained, the diffusion activation energy of NO<sub>2</sub> could be calculated by means of the Arrhenius equation:

$$D_s = D_0 \exp(-E'_a / RT) \quad (6)$$

where  $E'_a$ ,  $A$ , and  $R$  refer to the Arrhenius activation energy, the Arrhenius factor, and gas constant, respectively. Equation (6) can also be expressed as:

$$\ln D_s = \ln A - E'_a / RT \quad (7)$$

According to the data in **Table S3** and Equation (7), the diffusion activation energy

$E'_a$  could be directly calculated from the slope of the fitted curve. **Figure 6** shows the Arrhenius temperature dependence of the diffusion coefficients along with the activation energy for diffusion. Therefore, the energy barriers to be overcome in the process of NO<sub>2</sub> diffusion to the monolayer of Ag-C<sub>2</sub>N<sub>1</sub> and Cu-C<sub>2</sub>N<sub>1</sub> are 2.7 kJ/mol and 2.5 kJ/mol.



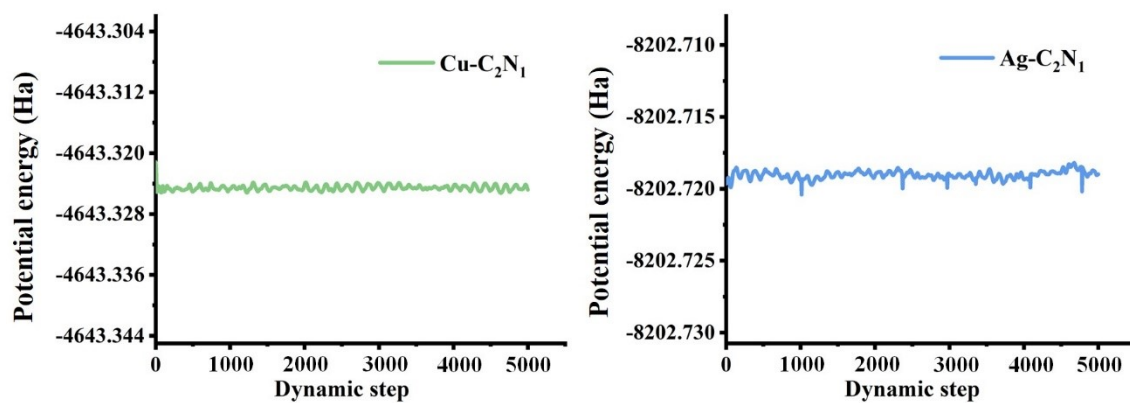

**Figure S1.** The energy fluctuations with time process for the *ab initio* molecular dynamics of Cu/Ag-C<sub>2</sub>N<sub>1</sub> monolayer.

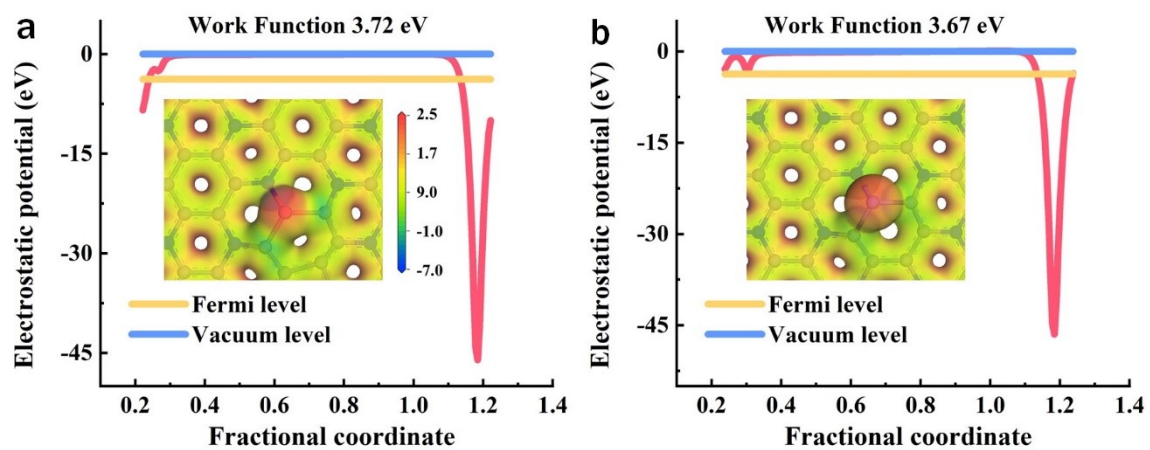

**Figure S2.** Electrostatic potential and work function of (a) the Cu-C<sub>2</sub>N<sub>1</sub> and (b) the Ag-C<sub>2</sub>N<sub>1</sub> monolayer.

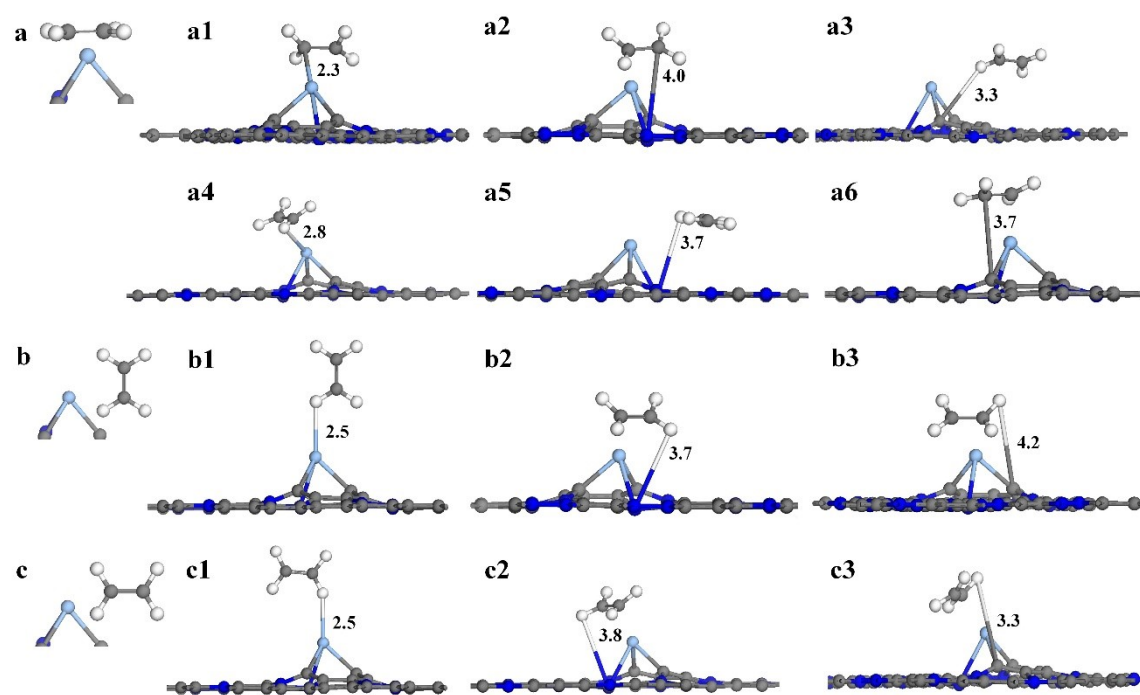

**Figure S3.** Adsorption structures of  $C_2H_4$  at different sites on the  $Ag-C_2N_1$ .

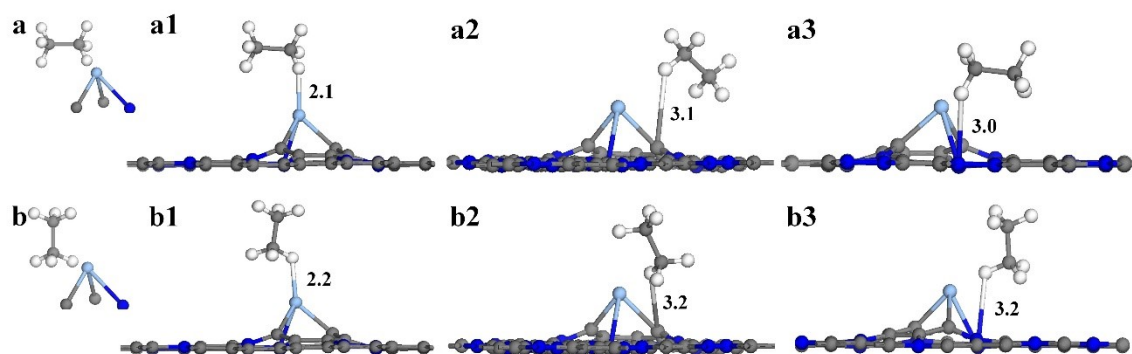

**Figure S4.** Adsorption structures of  $C_2H_6$  at different sites on the  $Ag-C_2N_1$ .

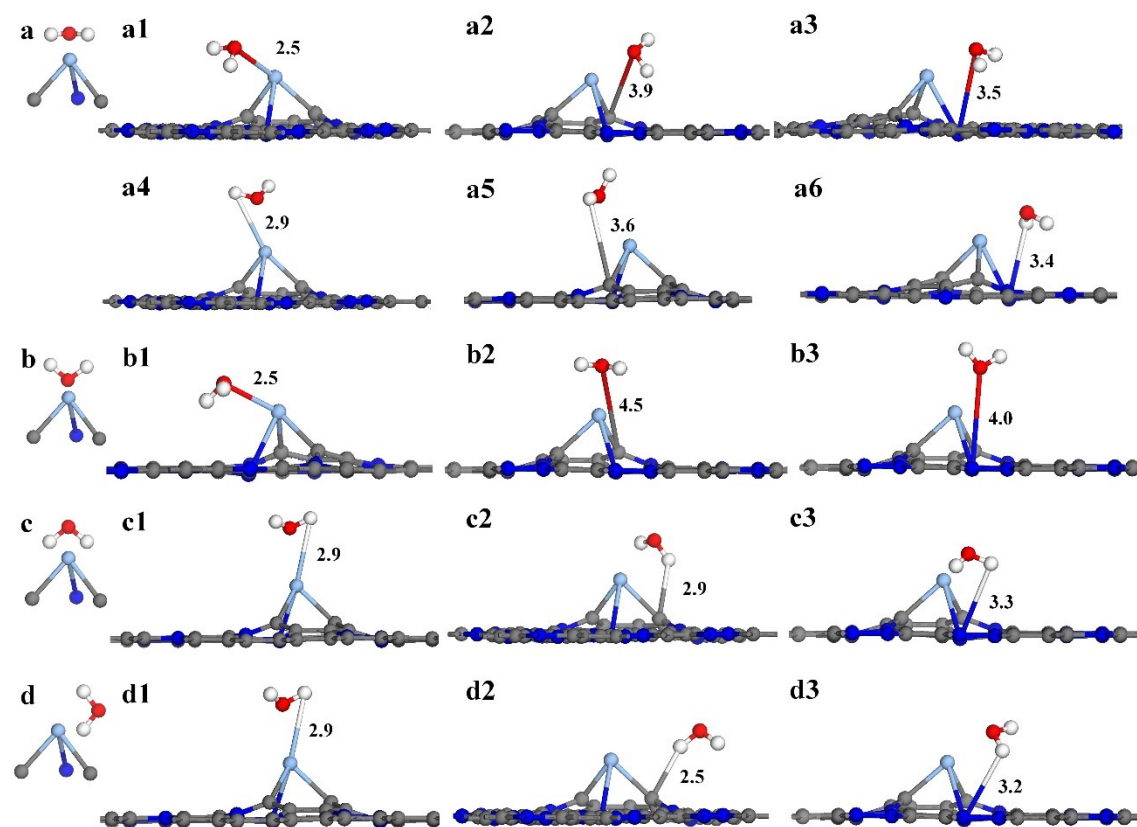

Figure S5. Adsorption structures of H<sub>2</sub>O at different sites on the Ag-C<sub>2</sub>N<sub>1</sub>.

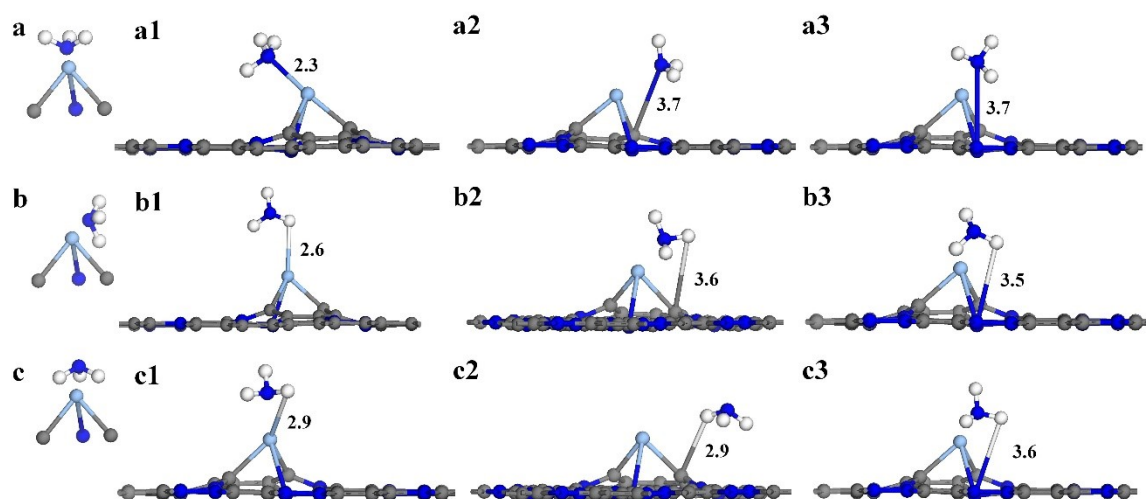

**Figure S6.** Adsorption structures of  $\text{NH}_3$  at different sites on the  $\text{Ag-C}_2\text{N}_1$ .

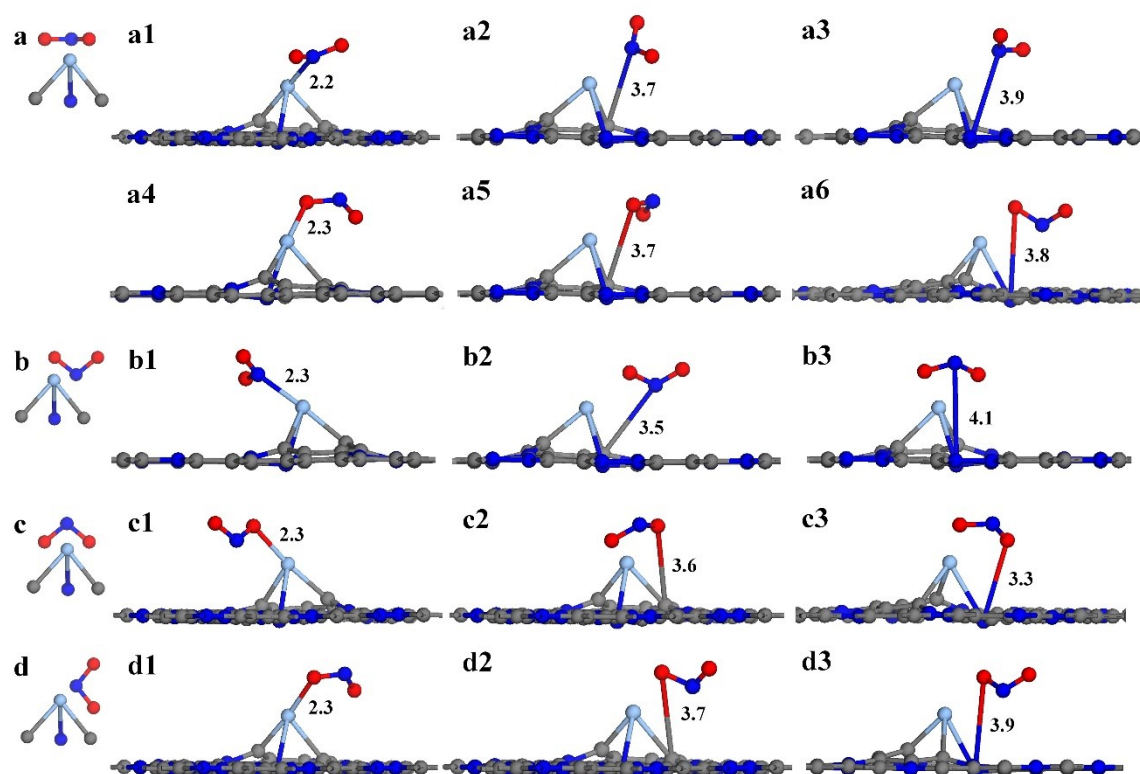

**Figure S7.** Adsorption structures of  $\text{NO}_2$  at different sites on the  $\text{Ag-C}_2\text{N}_1$ .

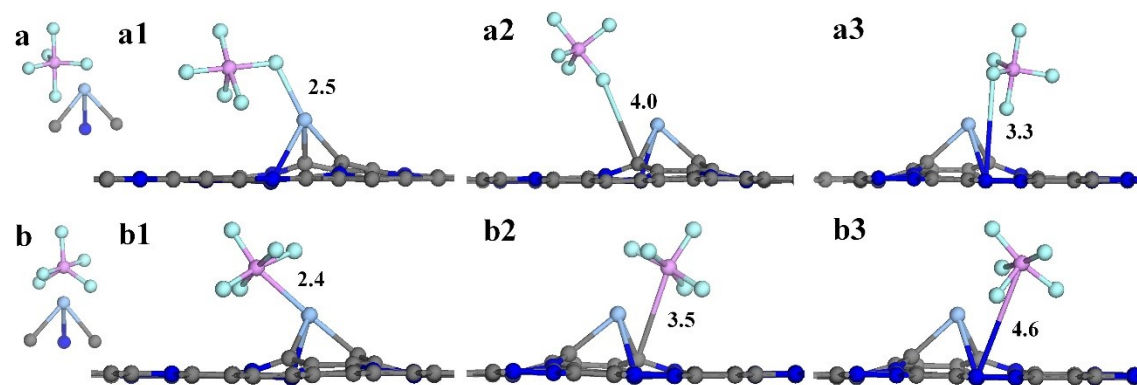

**Figure S8.** Adsorption structures of PF<sub>5</sub> at different sites on the Ag-C<sub>2</sub>N<sub>1</sub>.



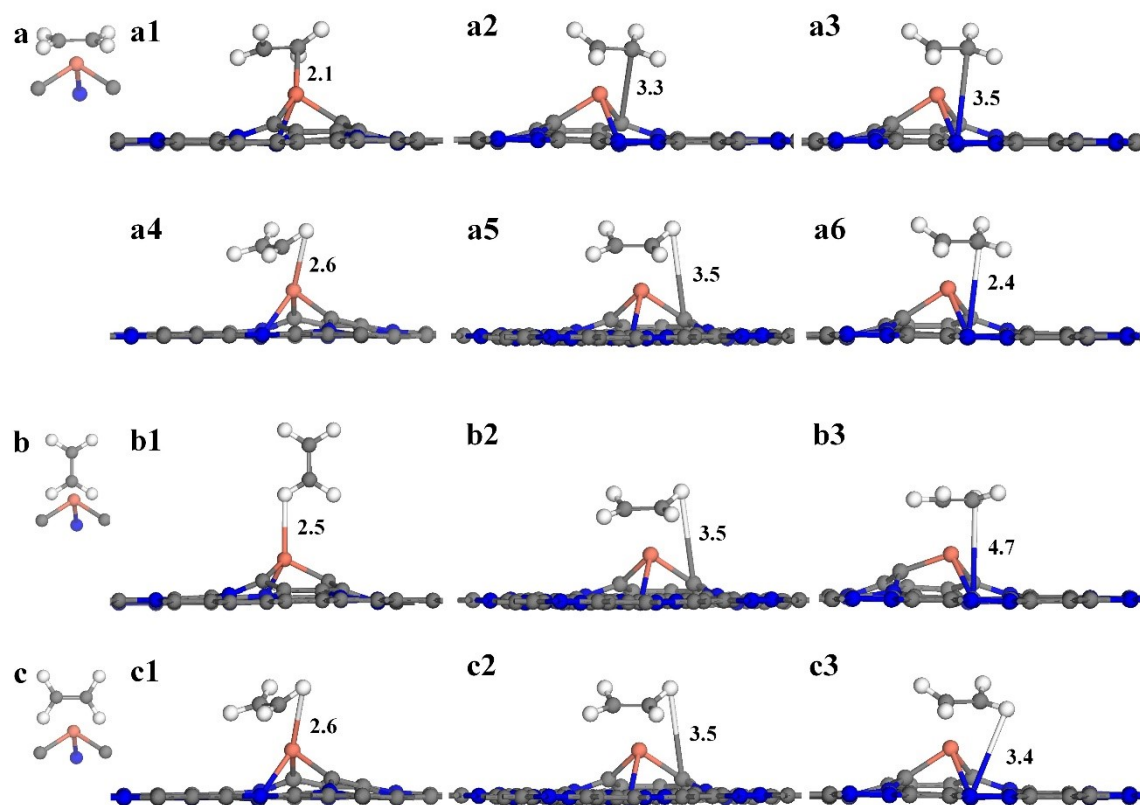

**Figure S9.** Adsorption structures of  $C_2H_4$  at different sites on the  $Cu-C_2N_1$ .

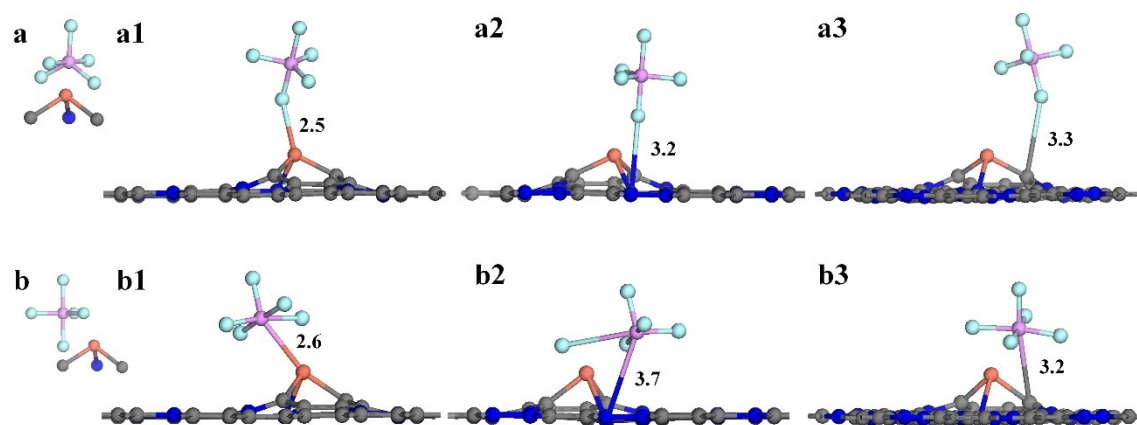

**Figure S10.** Adsorption structures of  $\text{PF}_5$  at different sites on the  $\text{Cu-C}_2\text{N}_1$ .

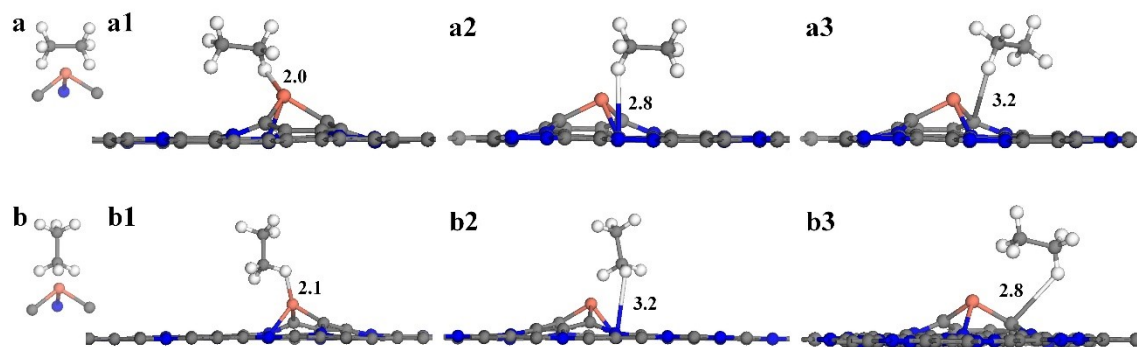

**Figure S11.** Adsorption structures of  $C_2H_6$  at different sites on the  $Cu-C_2N_1$ .

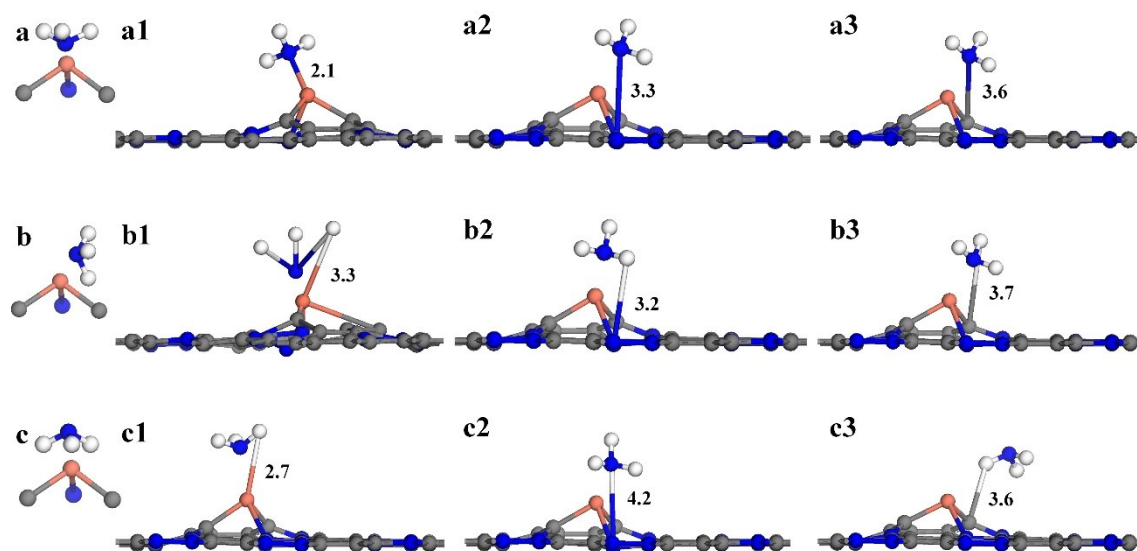

**Figure S12.** Adsorption structures of  $\text{NH}_3$  at different sites on the  $\text{Cu-C}_2\text{N}_1$ .

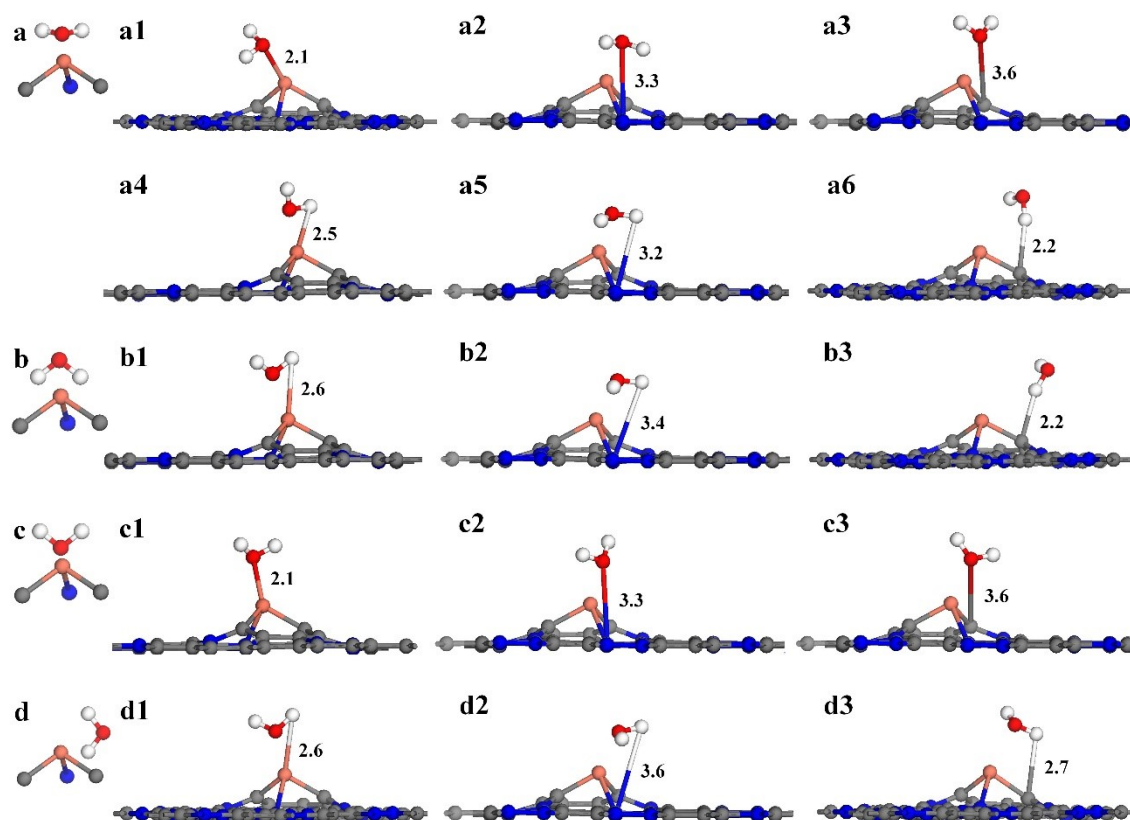

Figure S13. Adsorption structures of H<sub>2</sub>O at different sites on the Cu-C<sub>2</sub>N<sub>1</sub>.

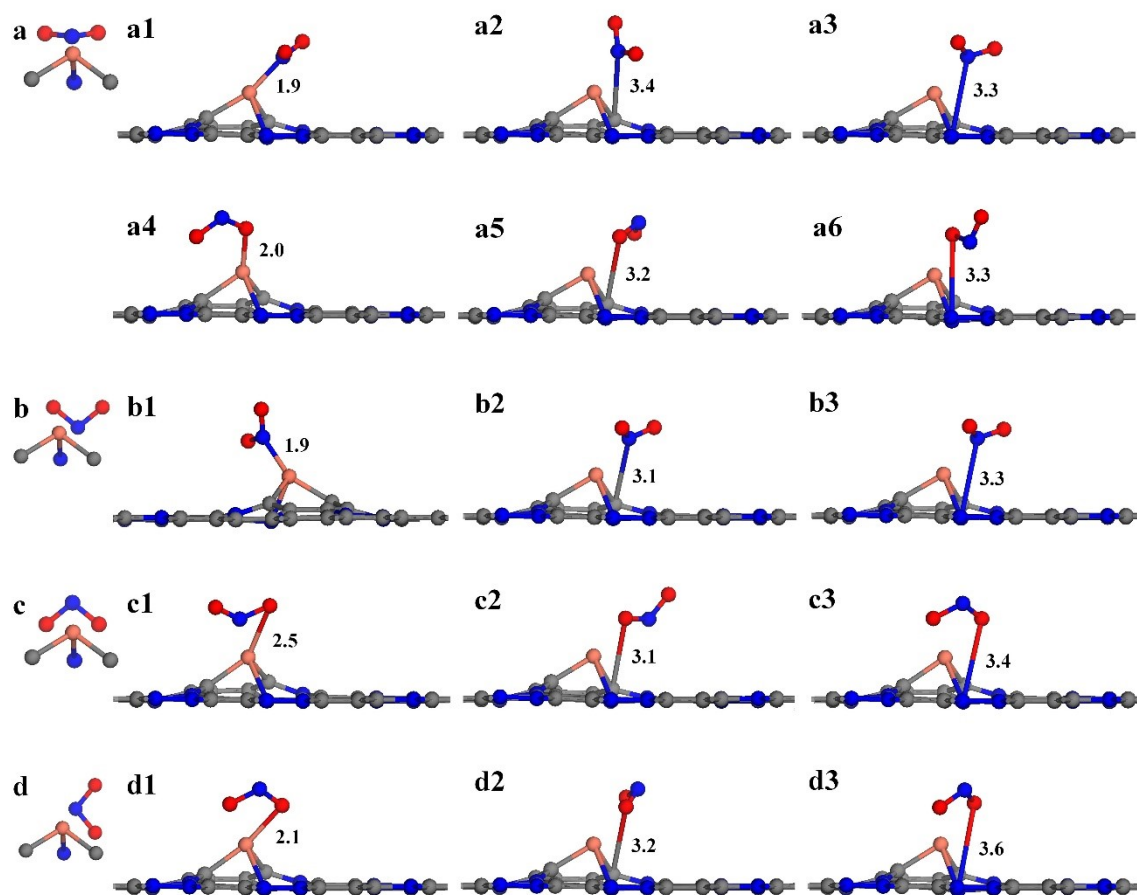

**Figure S14.** Adsorption structures of  $\text{NO}_2$  at different sites on the  $\text{Cu-C}_2\text{N}_1$ .

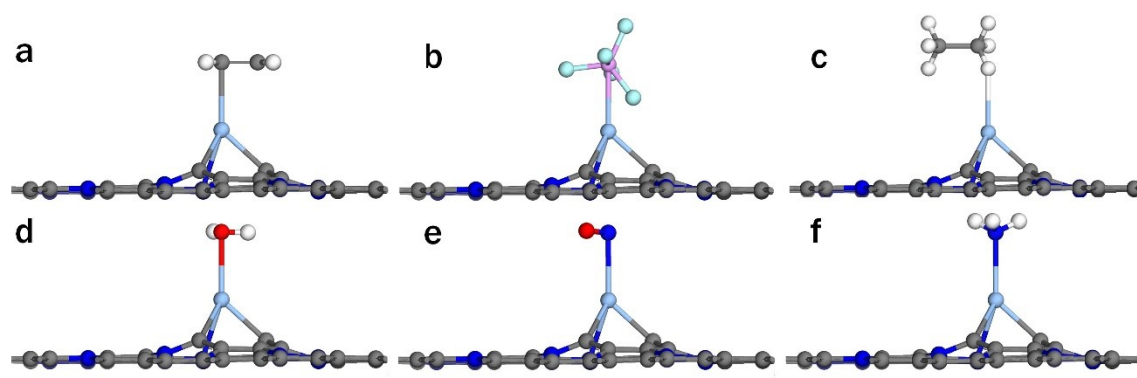

**Figure S15.** The initial adsorption configuration of gases ( $\text{PF}_5$ ,  $\text{NO}_2$ ,  $\text{NH}_3$ ,  $\text{H}_2\text{O}$ ,  $\text{C}_2\text{H}_4$ , and  $\text{C}_2\text{H}_6$ ) on the  $\text{Ag-C}_2\text{N}_1$ .

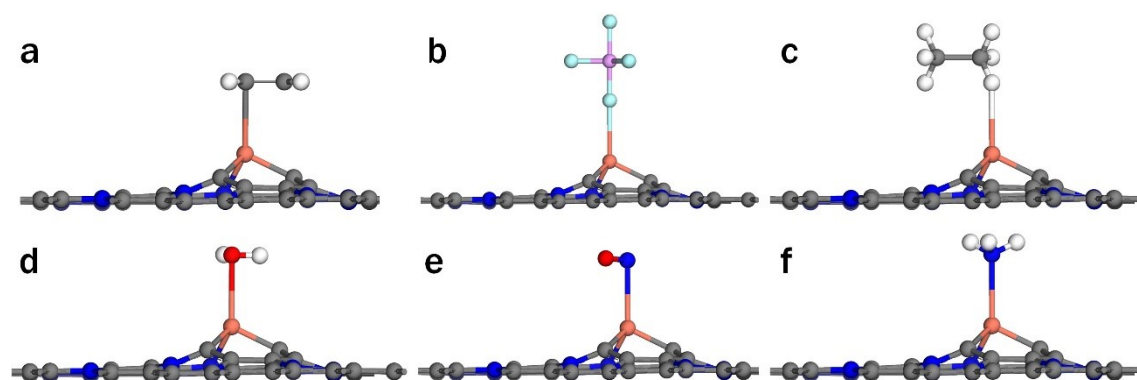

**Figure S16.** The initial adsorption configuration of gases ( $\text{PF}_5$ ,  $\text{NO}_2$ ,  $\text{NH}_3$ ,  $\text{H}_2\text{O}$ ,  $\text{C}_2\text{H}_4$ , and  $\text{C}_2\text{H}_6$ ) on the  $\text{Cu-C}_2\text{N}_1$ .



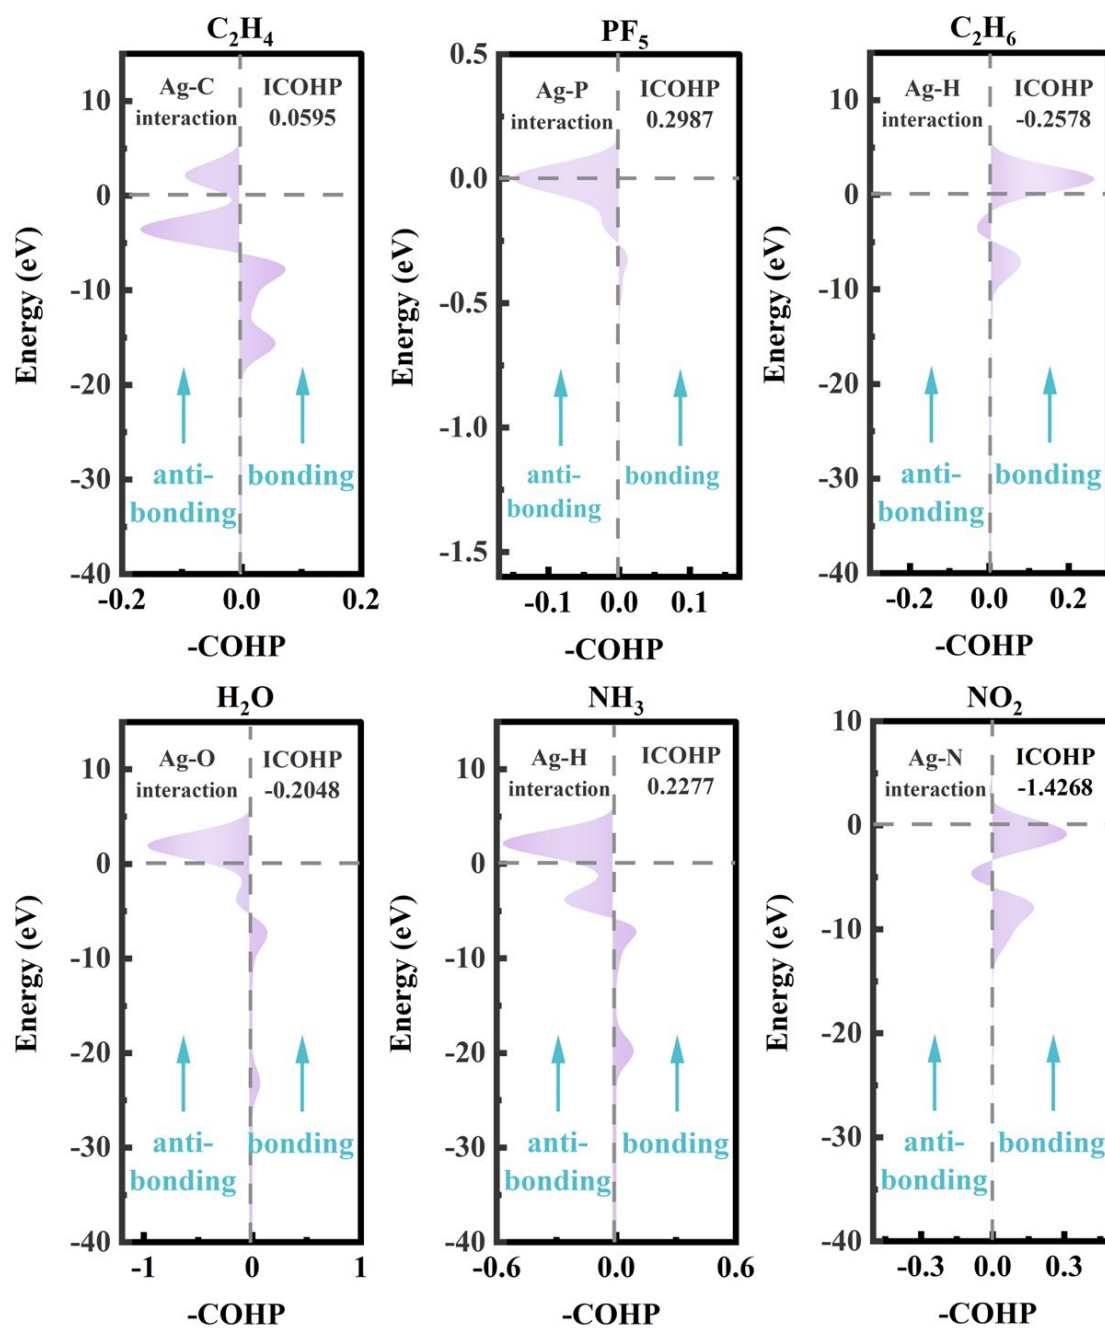

**Figure S17.** The COHP between gases (C<sub>2</sub>H<sub>4</sub>, PF<sub>5</sub>, C<sub>2</sub>H<sub>6</sub>, H<sub>2</sub>O, NH<sub>3</sub>, and NO<sub>2</sub>) and the Ag-C<sub>2</sub>N<sub>1</sub>.

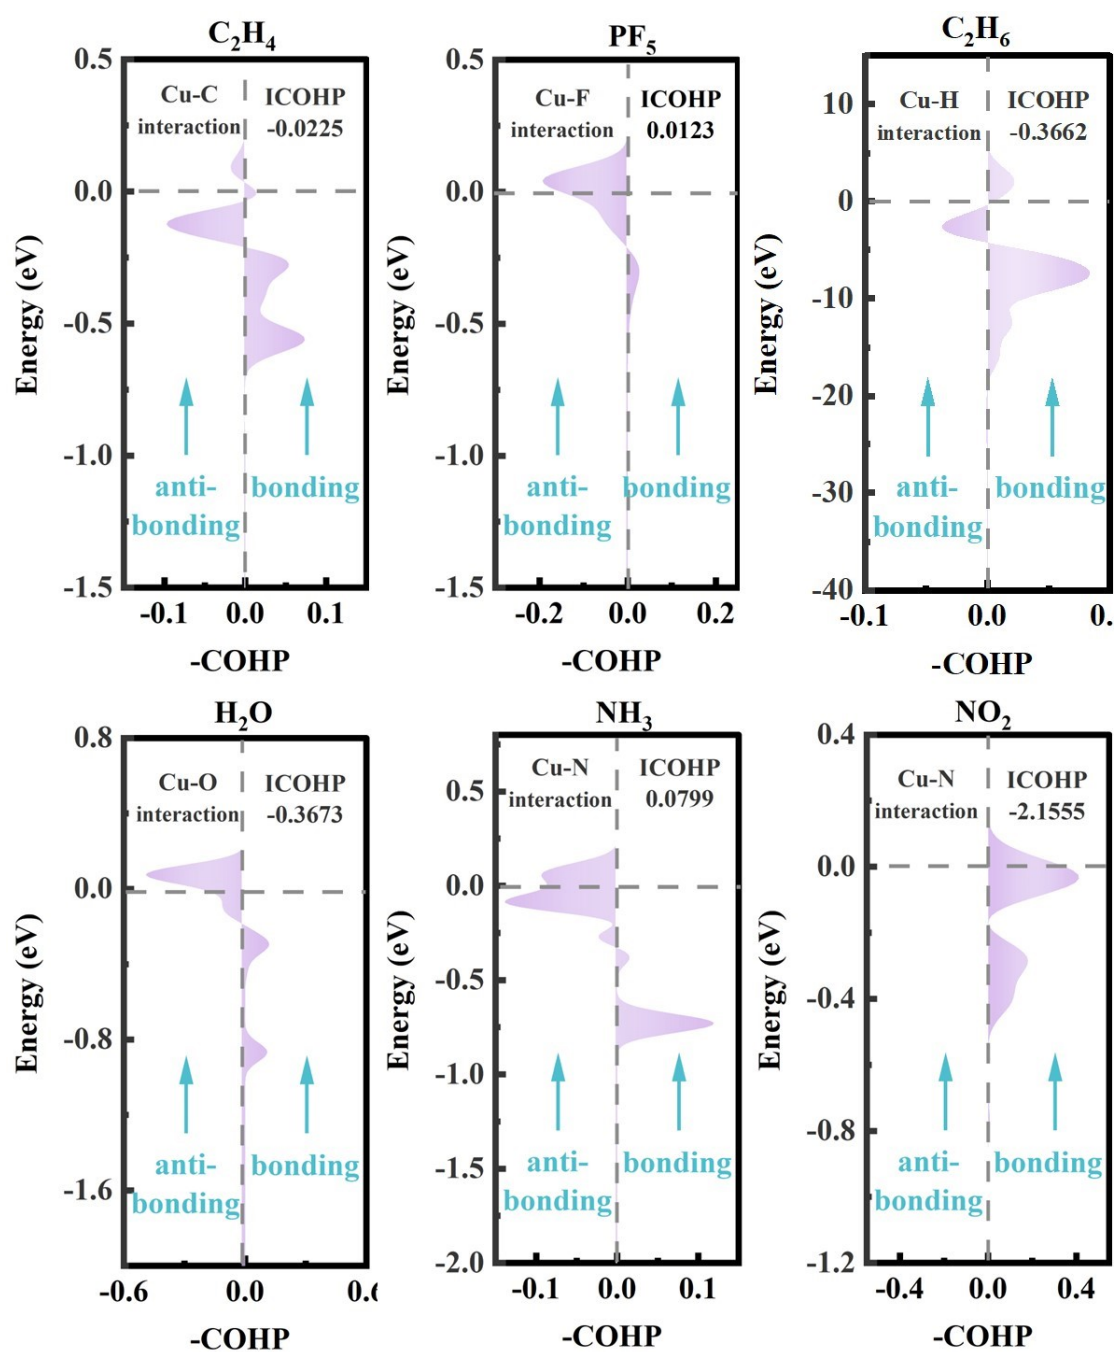

**Figure S18.** The COHP between gases (C<sub>2</sub>H<sub>4</sub>, PF<sub>5</sub>, C<sub>2</sub>H<sub>6</sub>, H<sub>2</sub>O, NH<sub>3</sub>, and NO<sub>2</sub>) and the Cu-C<sub>2</sub>N<sub>1</sub>.

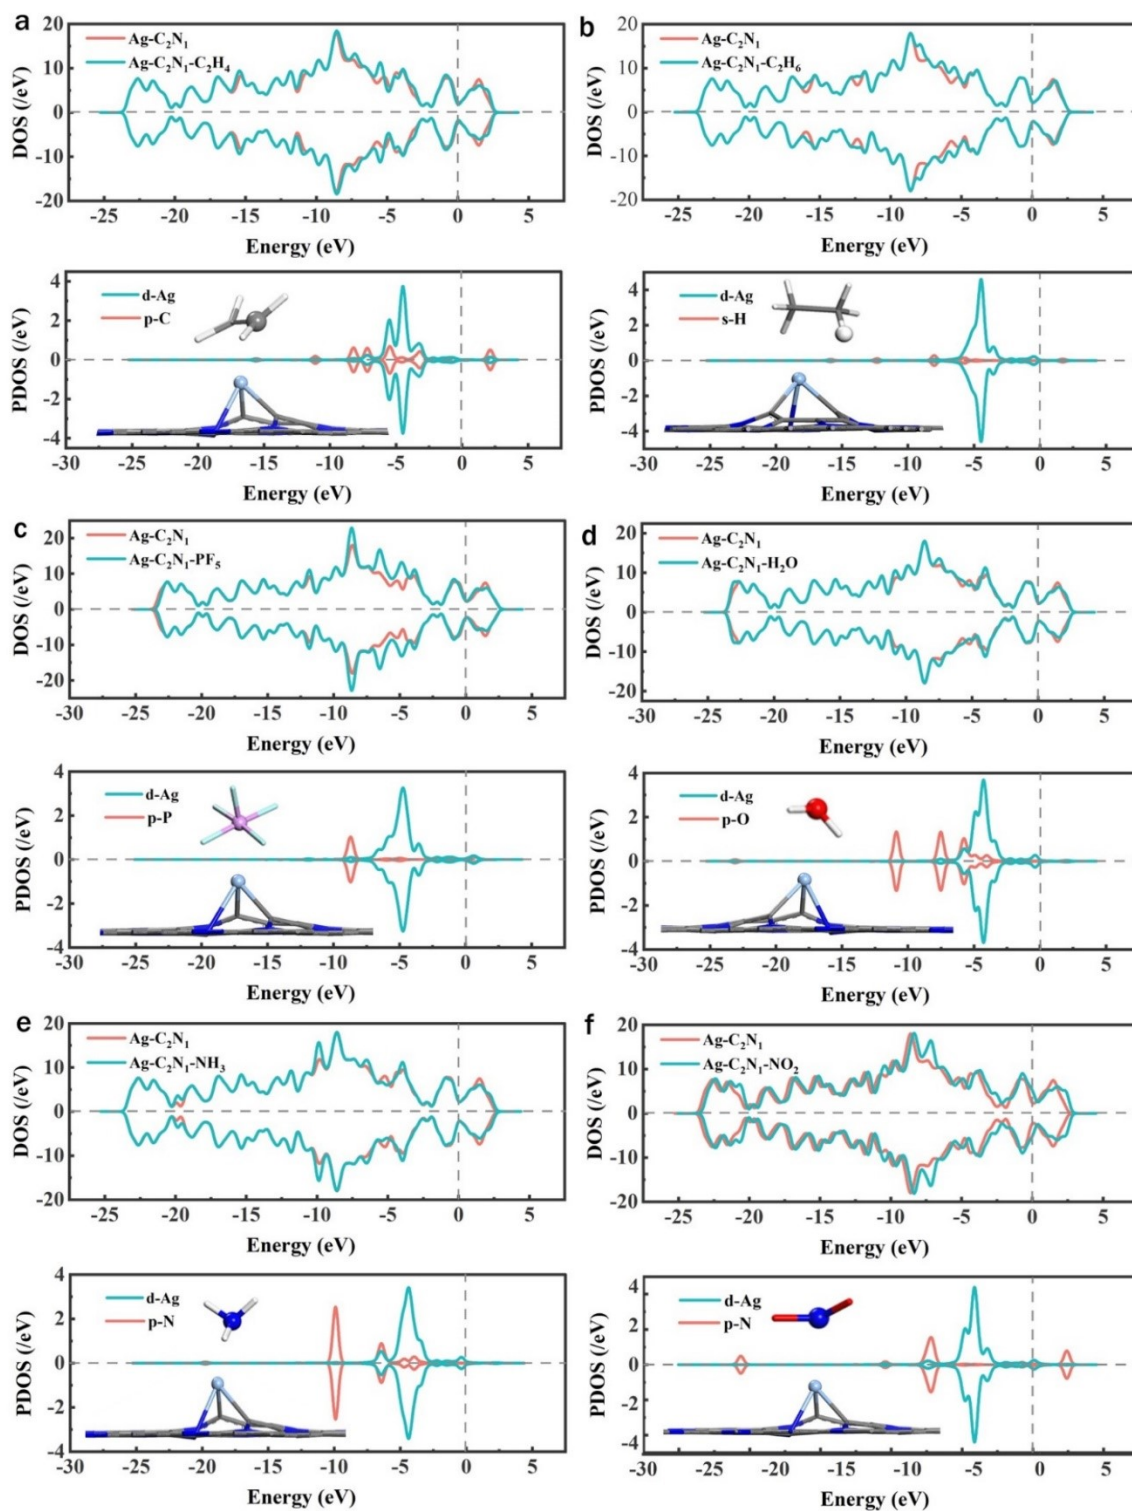

**Figure S19.** DOS and PDOS of (a) C<sub>2</sub>H<sub>4</sub>, (b) C<sub>2</sub>H<sub>6</sub>, (c) PF<sub>5</sub>, (d) H<sub>2</sub>O, (e) NH<sub>3</sub>, (f) NO<sub>2</sub> on the Ag-C<sub>2</sub>N<sub>1</sub> monolayer.

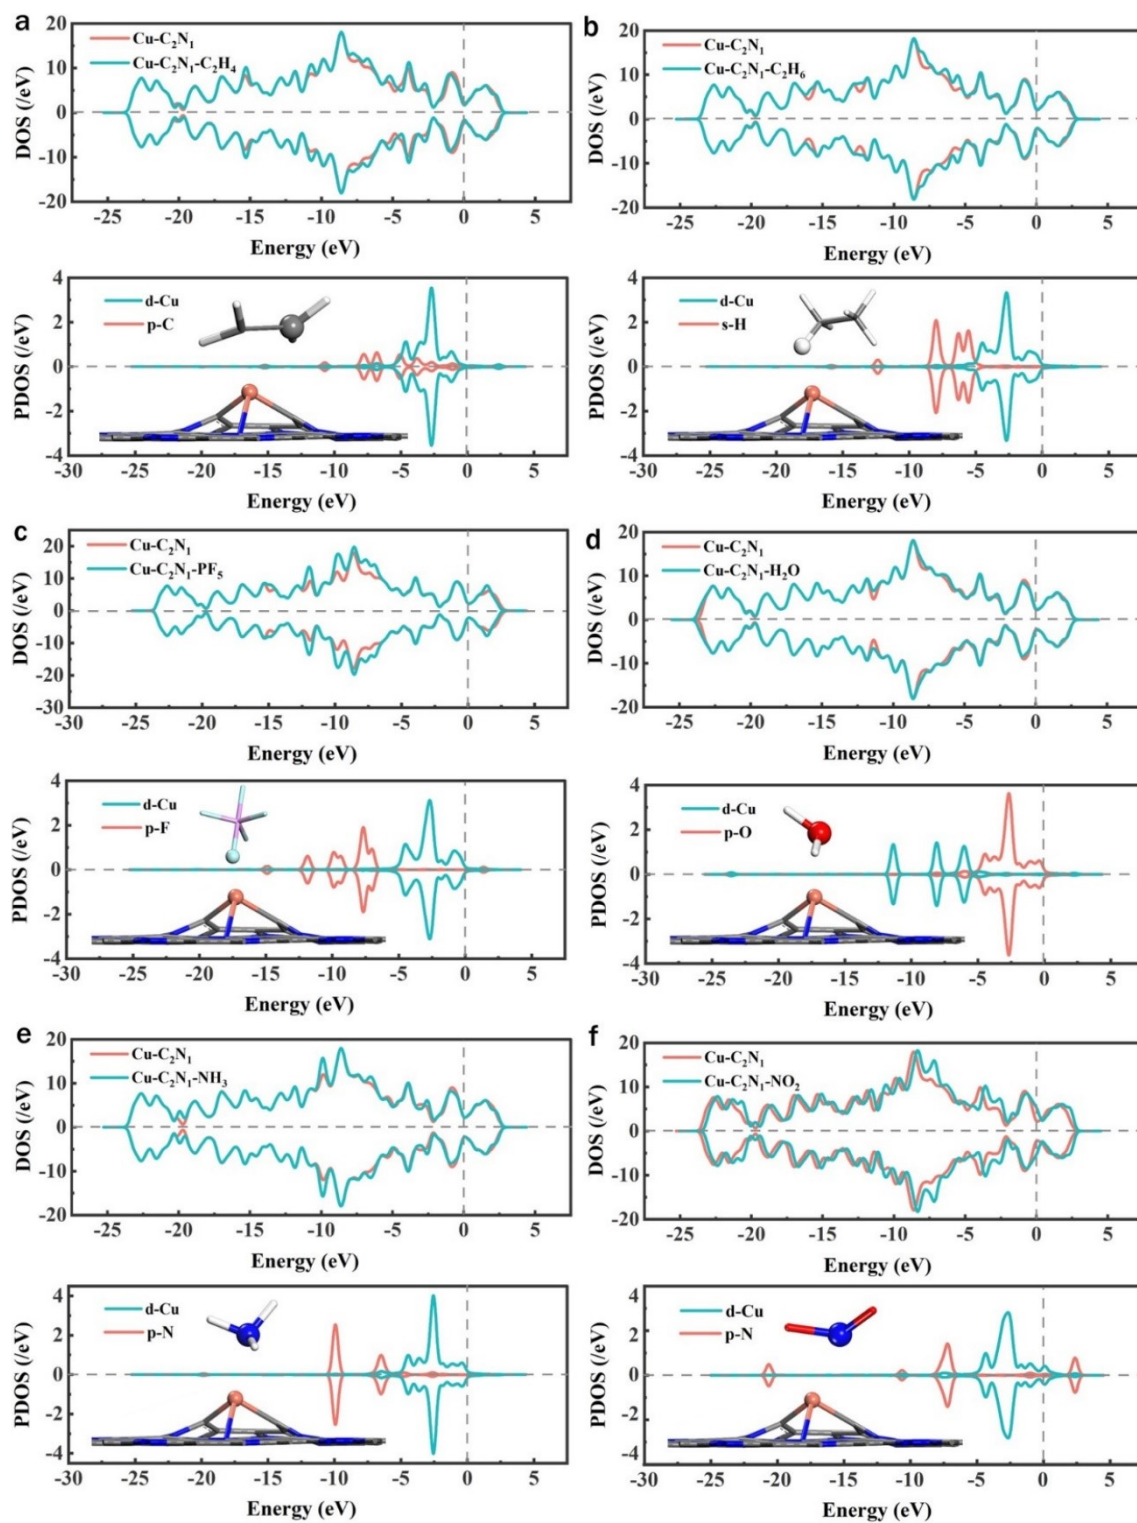

**Figure S20.** DOS and PDOS of (a) C<sub>2</sub>H<sub>4</sub>, (b) C<sub>2</sub>H<sub>6</sub>, (c) PF<sub>5</sub>, (d) H<sub>2</sub>O, (e) NH<sub>3</sub>, (f) NO<sub>2</sub> on the Cu C<sub>2</sub>N<sub>1</sub> monolayer.

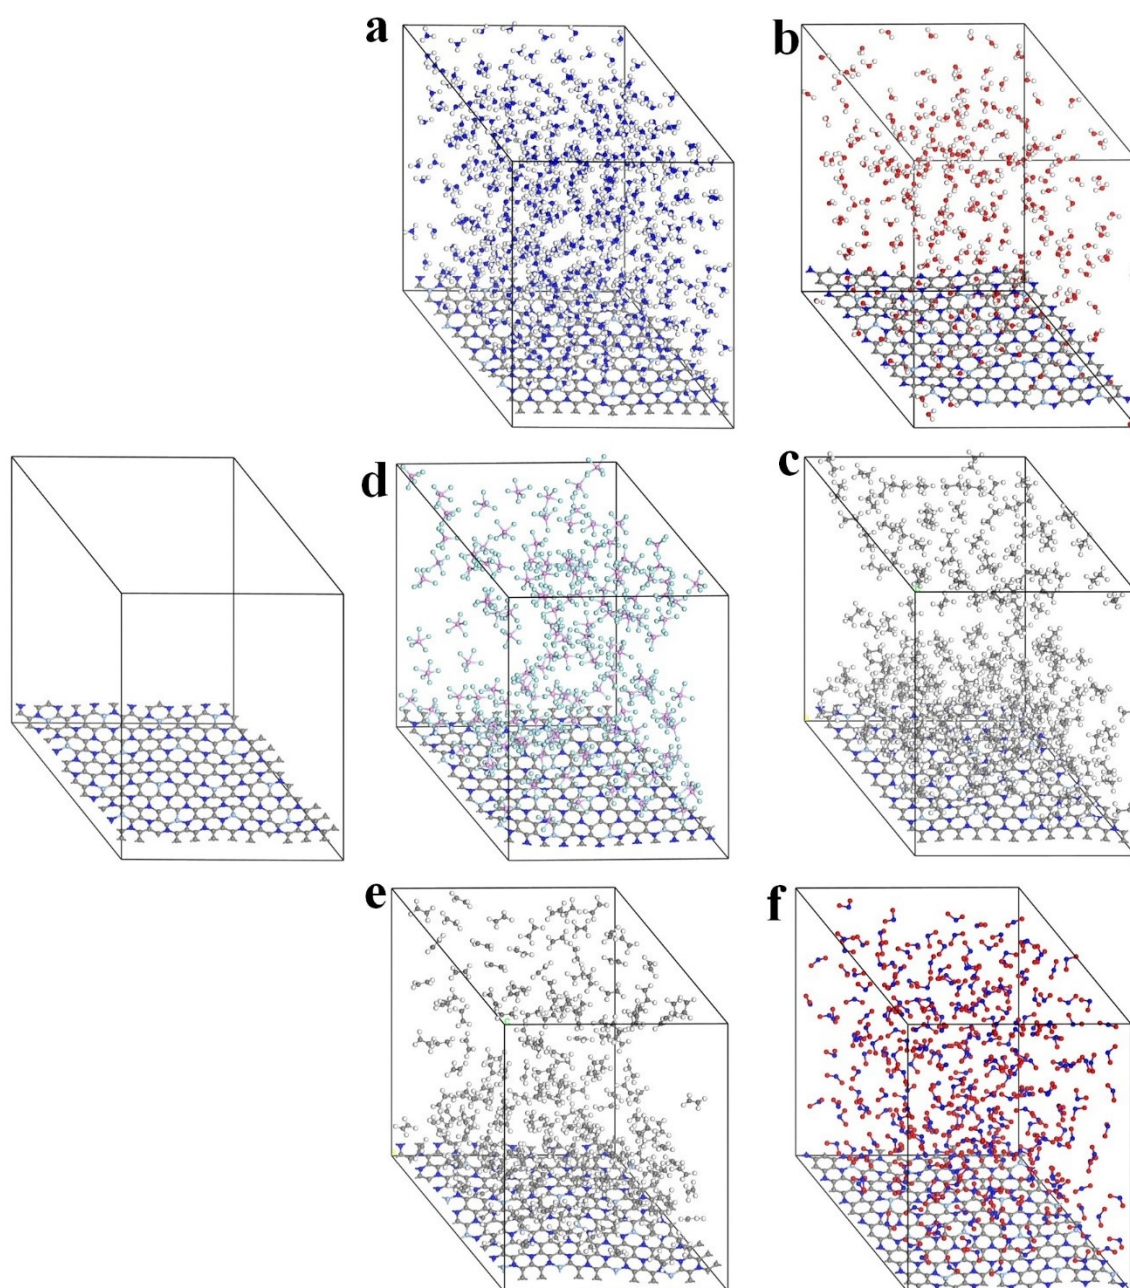

**Figure S21.** The initial and the final stable configurations of gas on the Ag-C<sub>2</sub>N<sub>1</sub>. (a) NH<sub>3</sub>, (b) H<sub>2</sub>O, (c) PF<sub>5</sub>, (d) C<sub>2</sub>H<sub>6</sub>, (e) C<sub>2</sub>H<sub>4</sub>, and (f) NO<sub>2</sub>.

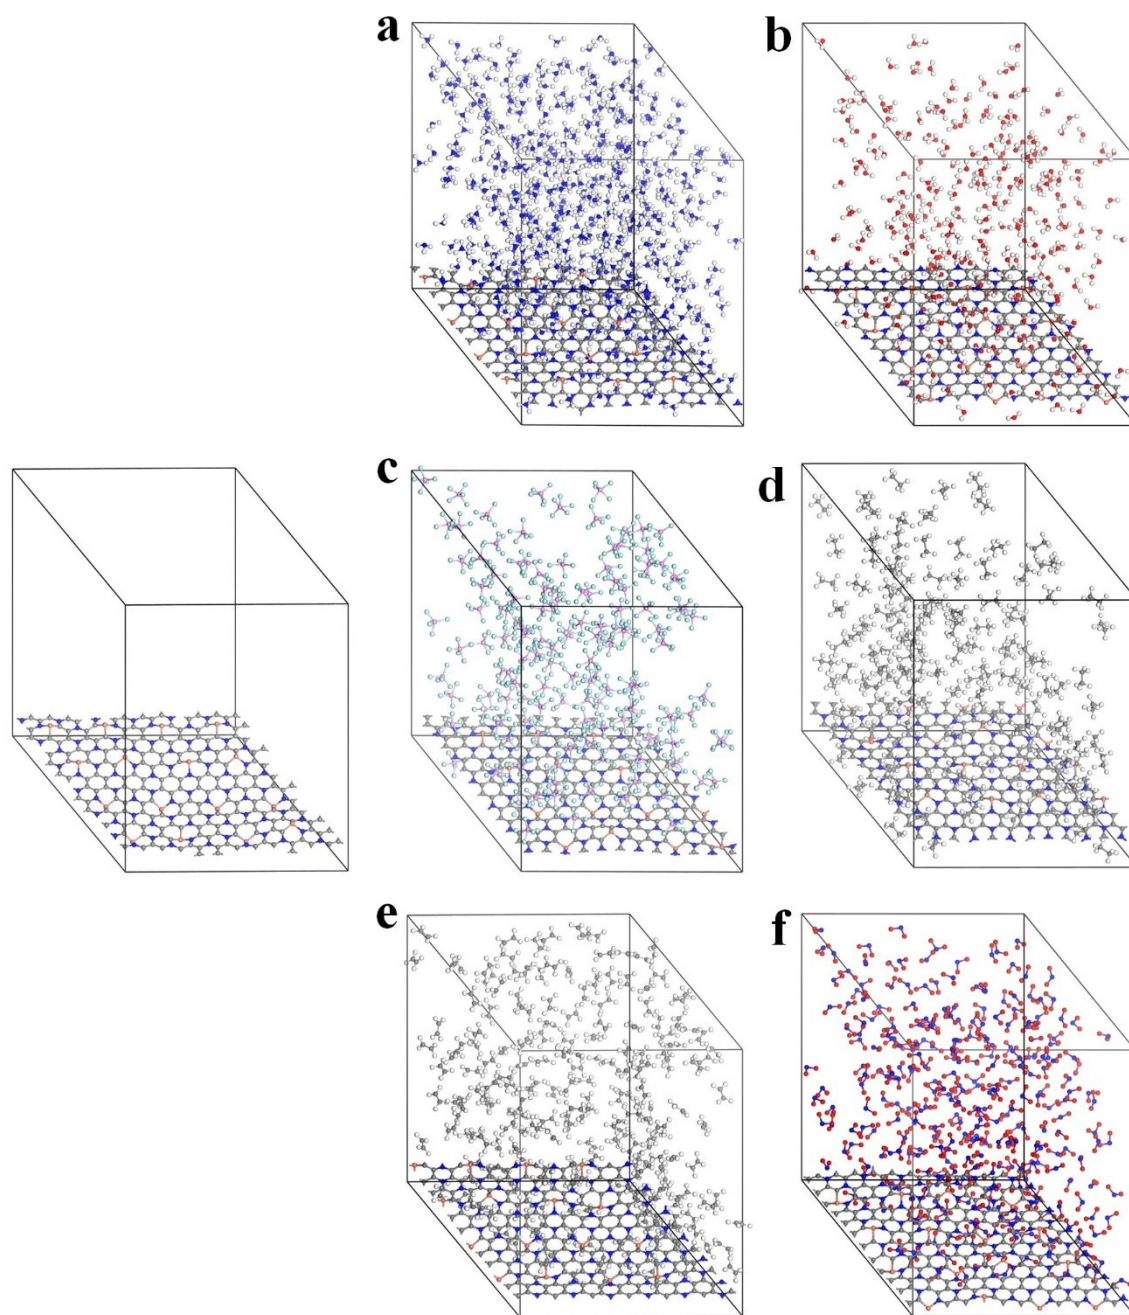

**Figure S22.** The initial and the final stable configurations of gas on the Cu-C<sub>2</sub>N<sub>1</sub>. (a) NH<sub>3</sub>, (b) H<sub>2</sub>O, (c) PF<sub>5</sub>, (d) C<sub>2</sub>H<sub>6</sub>, (e) C<sub>2</sub>H<sub>4</sub>, and (f) NO<sub>2</sub>.

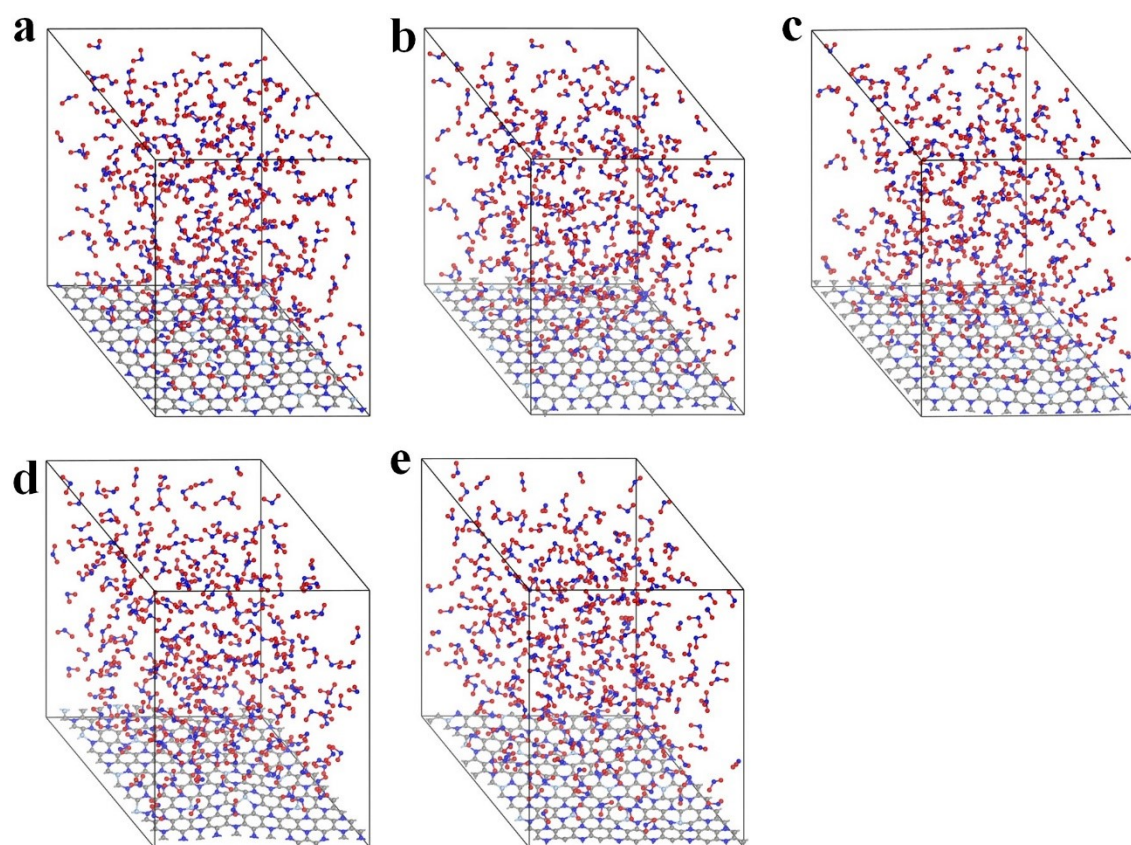

**Figure S23.** The stable configurations of NO<sub>2</sub> on the Ag-C<sub>2</sub>N<sub>1</sub> at different temperatures. (a) 300 K, (b) 400 K, (c) 500 K, (d) 600 K, and (e) 700 K.

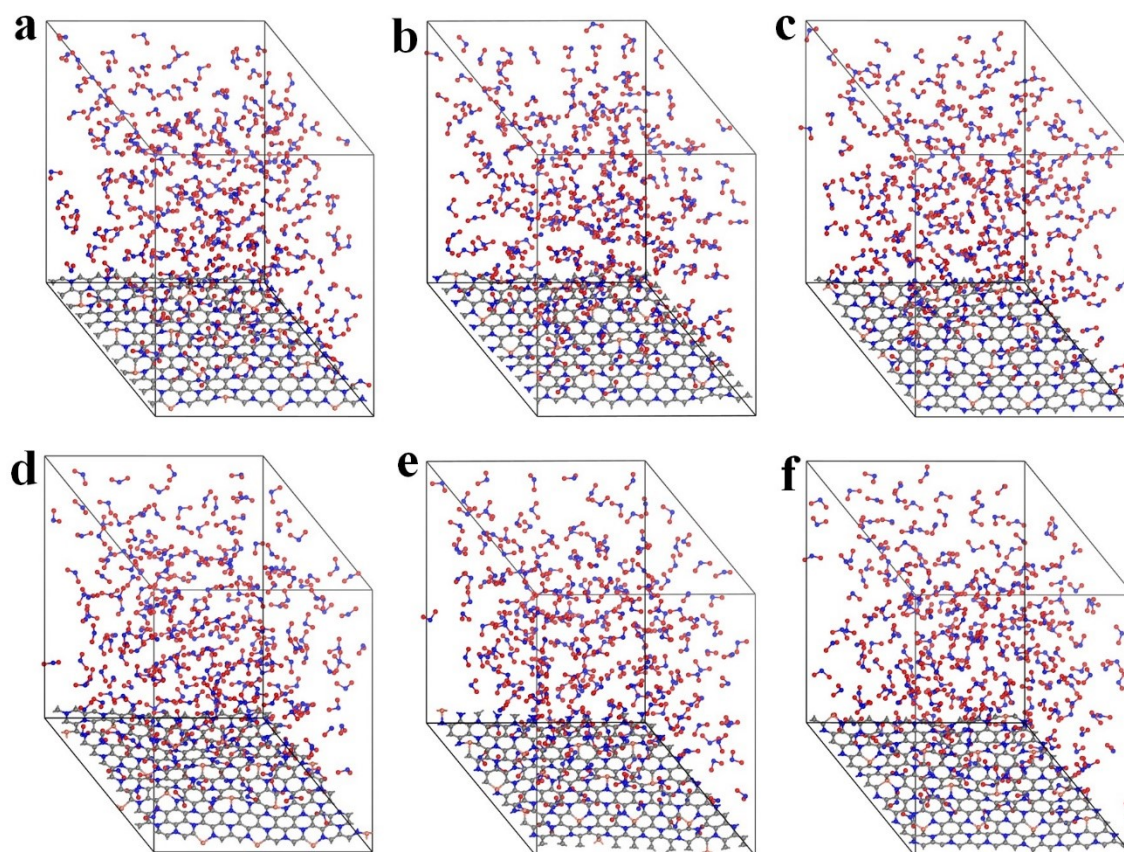

**Figure S24.** The stable configurations of NO<sub>2</sub> on the Cu-C<sub>2</sub>N<sub>1</sub> at different temperatures. (a) 300 K, (b) 400 K, (c) 500 K, (d) 600 K, (e) 700 K, and (f) 800 K.



**Table S1.** The amount of charge transferred by the gas adsorbed.

| Gas                           | Cu-C <sub>2</sub> N <sub>1</sub> | Ag-C <sub>2</sub> N <sub>1</sub> |
|-------------------------------|----------------------------------|----------------------------------|
| C <sub>2</sub> H <sub>4</sub> | -0.09                            | -0.07                            |
| H <sub>2</sub> O              | 0.12                             | 0.09                             |
| NO <sub>2</sub>               | -0.48                            | -0.44                            |
| NH <sub>3</sub>               | 0.16                             | 0.13                             |
| C <sub>2</sub> H <sub>6</sub> | 0.10                             | 0.06                             |
| PF <sub>5</sub>               | 0.01                             | -0.91                            |

**Table S2.** Diffusion coefficient of six gases on the Cu/Ag-C<sub>2</sub>N<sub>1</sub> monolayer at 300 K.

| Gas                           | Cu-C <sub>2</sub> N <sub>1</sub> | Ag-C <sub>2</sub> N <sub>1</sub> |
|-------------------------------|----------------------------------|----------------------------------|
| C <sub>2</sub> H <sub>4</sub> | 4.89                             | 5.78                             |
| H <sub>2</sub> O              | 6.73                             | 6.60                             |
| NO <sub>2</sub>               | 2.47                             | 2.83                             |
| NH <sub>3</sub>               | 5.37                             | 5.07                             |
| C <sub>2</sub> H <sub>6</sub> | 4.89                             | 4.13                             |
| PF <sub>5</sub>               | 4.39                             | 3.72                             |

**Table S3.** Diffusion coefficients of NO<sub>2</sub> on the Cu/Ag-C<sub>2</sub>N<sub>1</sub> at different temperatures.

| T (K)                            | 300  | 400  | 500  | 600  | 700  | 800  |
|----------------------------------|------|------|------|------|------|------|
| Cu-C <sub>2</sub> N <sub>1</sub> | 2.47 | 3.12 | 3.37 | 4.44 | 4.03 | 4.24 |
| Ag-C <sub>2</sub> N <sub>1</sub> | 2.83 | 3.47 | 3.78 | 3.70 | 5.18 | -    |

**Table S4.** The recovery time (s) of the gas on the Cu-C<sub>2</sub>N<sub>1</sub>.

| T(K) | C <sub>2</sub> H <sub>4</sub> | H <sub>2</sub> O     | NO <sub>2</sub>      | NH <sub>3</sub>      | C <sub>2</sub> H <sub>6</sub> | PF <sub>5</sub>       |
|------|-------------------------------|----------------------|----------------------|----------------------|-------------------------------|-----------------------|
| 273  | 4.3×10 <sup>24</sup>          | 2.0×10 <sup>3</sup>  | 1.9×10 <sup>53</sup> | 6.9×10 <sup>13</sup> | 11.6                          | 3.6×10 <sup>-9</sup>  |
| 300  | 2.2×10 <sup>21</sup>          | 83.6                 | 2.5×10 <sup>47</sup> | 3.2×10 <sup>11</sup> | 0.8                           | 1.7×10 <sup>-9</sup>  |
| 400  | 1.0×10 <sup>13</sup>          | 2.0×10 <sup>-2</sup> | 3.6×10 <sup>32</sup> | 4.3×10 <sup>5</sup>  | 8.3×10 <sup>-4</sup>          | 2.7×10 <sup>-10</sup> |
| 500  | 1.0×10 <sup>8</sup>           | 2.3×10 <sup>-4</sup> | 4.4×10 <sup>23</sup> | 1.3×10 <sup>2</sup>  | 1.4×10 <sup>-5</sup>          | 8.8×10 <sup>-11</sup> |
| 600  | 4.7×10 <sup>4</sup>           | 9.1×10 <sup>-6</sup> | 5.0×10 <sup>17</sup> | 0.6                  | 8.8×10 <sup>-7</sup>          | 4.2×10 <sup>-11</sup> |
| 700  | 1.9×10 <sup>2</sup>           | 9.3×10 <sup>-7</sup> | 2.9×10 <sup>13</sup> | 1.2×10 <sup>-2</sup> | 1.2×10 <sup>-7</sup>          | 2.4×10 <sup>-11</sup> |
| 800  | 3.2                           | 1.7×10 <sup>-7</sup> | 1.9×10 <sup>10</sup> | 6.6×10 <sup>-4</sup> | 2.9×10 <sup>-8</sup>          | 1.6×10 <sup>-11</sup> |

**Table S5.** The recovery time (s) of the gas on the Ag-C<sub>2</sub>N<sub>1</sub>.

| T(K) | C <sub>2</sub> H <sub>4</sub> | H <sub>2</sub> O     | NO <sub>2</sub>      | NH <sub>3</sub>      | C <sub>2</sub> H <sub>6</sub> | PF <sub>5</sub>      |
|------|-------------------------------|----------------------|----------------------|----------------------|-------------------------------|----------------------|
| 273  | 4.8×10 <sup>16</sup>          | 49.4                 | 1.9×10 <sup>48</sup> | 1.4×10 <sup>10</sup> | 5.8×10 <sup>-4</sup>          | 4.4×10 <sup>5</sup>  |
| 300  | 1.3×10 <sup>14</sup>          | 2.9                  | 7.1×10 <sup>42</sup> | 1.4×10 <sup>8</sup>  | 9.5×10 <sup>-5</sup>          | 1.1×10 <sup>4</sup>  |
| 400  | 3.7×10 <sup>7</sup>           | 2.2×10 <sup>-3</sup> | 1.4×10 <sup>29</sup> | 1.3×10 <sup>3</sup>  | 9.6×10 <sup>-7</sup>          | 1.1                  |
| 500  | 4.6×10 <sup>3</sup>           | 3.0×10 <sup>-5</sup> | 8.1×10 <sup>20</sup> | 1.2                  | 6.1×10 <sup>-8</sup>          | 4.3×10 <sup>-3</sup> |
| 600  | 11.2                          | 1.7×10 <sup>-6</sup> | 2.7×10 <sup>15</sup> | 1.2×10 <sup>-2</sup> | 9.7×10 <sup>-9</sup>          | 1.1×10 <sup>-4</sup> |
| 700  | 0.2                           | 2.2×10 <sup>-7</sup> | 3.2×10 <sup>11</sup> | 4.3×10 <sup>-4</sup> | 2.6×10 <sup>-9</sup>          | 7.6×10 <sup>-6</sup> |

**References**

- [1] B. Delley, From molecules to solids with the DMol<sup>3</sup> approach, *The Journal of chemical physics*, 113 (2000) 7756-7764.
- [2] J.P. Perdew, K. Burke, M. Ernzerhof, Generalized Gradient Approximation Made Simple, *Physical review letters*, 77 (1996) 3865-3868.
- [3] J.P. Perdew, Y. Wang, Accurate and simple analytic representation of the electron-gas correlation energy, *Physical review. B, Condensed matter*, 45 (1992) 13244-13249.
- [4] S. Grimme, Semiempirical GGA-type density functional constructed with a long-range dispersion correction, *Journal of computational chemistry*, 27 (2006) 1787-1799.
- [5] R.S. Mulliken, Electronic Population Analysis on LCAO–MO Molecular Wave Functions. I, *The Journal of chemical physics*, 23 (1955) 1833-1840.
- [6] L. Tao, J. Huang, X. Yin, Q. Wang, Z. Li, G. Wang, B. Cui, Adsorption Kinetics of CO<sub>2</sub> on a Reconstructed Calcite Surface: An Experiment-Simulation Collaborative Method, *Energy & Fuels*, 33 (2019) 8946-8953.
